# Supplementary material for: Multiplexed biosensor for point-of-care COVID-19 monitoring: CRISPR-powered unamplified RNA diagnostics and protein-based therapeutic drug management
Source: bioRxiv or medRxiv preprint supplement (doi:10.1101/2022.03.30.22271928), 2022-04-06
Supplement: Supplementary file [file media-2.pdf]

Albert-Ludwigs-Universität Freiburg  
Department of Microsystems Engineering (IMTEK)  
Dr.-Ing. Can Dincer  
Georges-Köhler-Allee 103  
79110 Freiburg

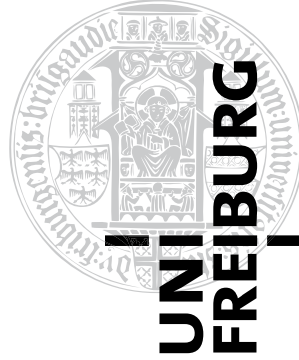

Albert-Ludwigs-Universität  
Freiburg

### Ethik-Kommission

**Application Number:** 22-1137-Anfrage (*please quote in any communication*)  
**Project Leader:** Dr.-Ing. Can Dincer  
**Research Project:** Methodenvalidierung: Analyse von COVID-19-Patientenproben  
[Method validation: analysis of COVID-19 patient samples]  
Your request dated 14<sup>th</sup> March 2022

Prof. Dr. R. Korinthenberg  
(Vorsitzender)  
M. Schmidt  
(Geschäftsführer)

Engelberger Straße 21  
79106 Freiburg

Tel. 0761/270-72500  
Fax 0761/270-72630

[www.ethik-kommission.uniklinik-freiburg.de](http://www.ethik-kommission.uniklinik-freiburg.de)  
[ekfr@uniklinik-freiburg.de](mailto:ekfr@uniklinik-freiburg.de)

Bearbeitet von:  
Jonas Christoph

Dear Dr. Dincer,

thank you for your request dated 14<sup>th</sup> March 2022 regarding the research project mentioned above.

The Ethics Committee hereby declares that there was no obligation for you to seek advice from the Ethics Committee under German law.

Yours sincerely

Prof. Dr. R. Korinthenberg  
Chairman of the Ethics Committee

Freiburg, 29.03.2022
